# Supplementary material for: Self-amplifying RNA SARS-CoV-2 lipid nanoparticle vaccine induces equivalent preclinical antibody titers and viral neutralization to recovered COVID-19 patients
Source: bioRxiv or medRxiv preprint supplement (doi:10.1101/2020.04.22.055608), 2020-04-25
Supplement: Supplementary file [file media-1.pdf]

**Supplementary Information for:**

**Self-amplifying RNA SARS-CoV-2 lipid nanoparticle vaccine induces  
equivalent preclinical antibody titers and viral neutralization to  
recovered COVID-19 patients**

Paul F. McKay<sup>1</sup>, Kai Hu<sup>1</sup>, Anna K. Blakney<sup>1</sup>, Karnyart Samnuan<sup>1</sup>, Clément R. Bouton<sup>1</sup>, Paul Rogers<sup>1</sup>, Krunal Polra<sup>1</sup>, Paulo J.C. Lin<sup>2</sup>, Christopher Barbosa<sup>2</sup>, Ying Tam<sup>2</sup>, Robin J. Shattock<sup>1,\*</sup>

<sup>1</sup> Department of Infectious Diseases, Imperial College London, Norfolk Place, London, United Kingdom W2 1PG

<sup>2</sup>Acuitas Therapeutics, Vancouver, British Columbia, Canada, V6T 1Z3

\*Corresponding author. Email: r.shattock@imperial.ac.uk

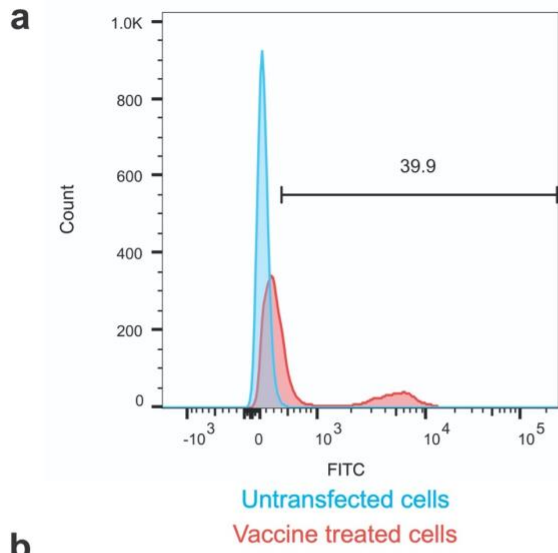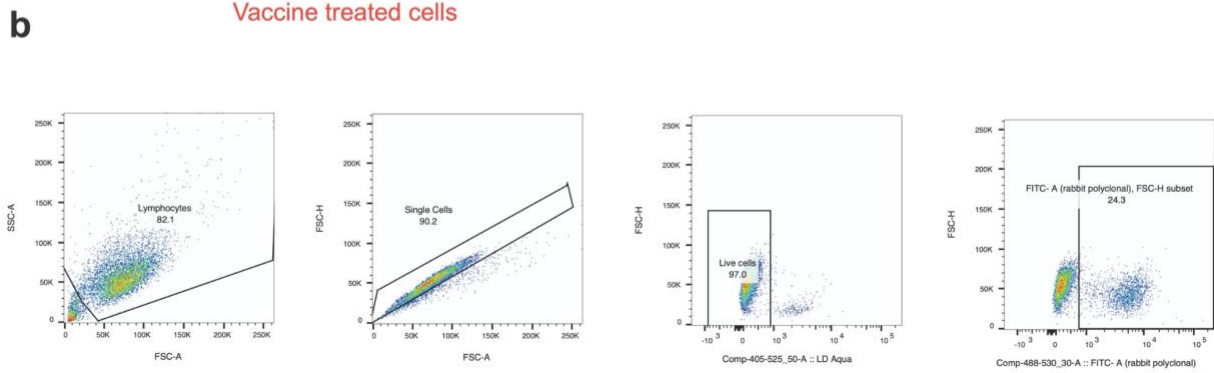

**Supplementary Figure 1.** Flow cytometry of HEK293T.17 cells transfected with vaccine expressing membrane bound SARS-CoV-2 spike protein.

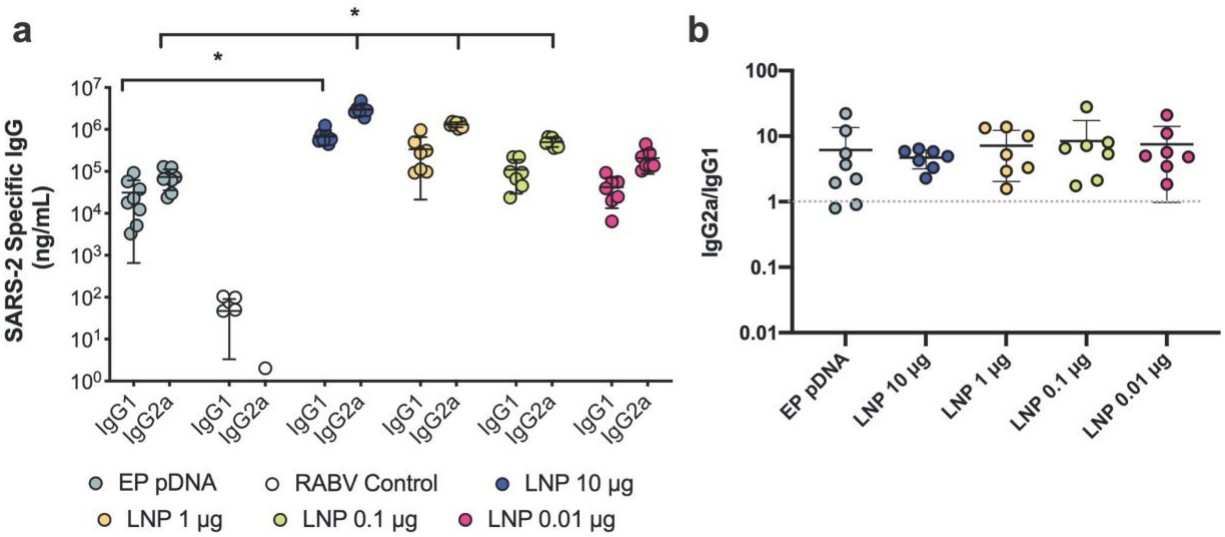

**Supplementary Figure 2.** Th1/Th2 skew in response to SARS-CoV-2 saRNA LNP vaccine. a) IgG1 and IgG2a responses in mice vaccinated with doses of LNP-formulated saRNA ranging from 0.01-10 µg of saRNA with n=7, b) Th1/Th2 skewing responses in mice vaccinated with doses of LNP-formulated saRNA ranging from 0.01-10 µg of saRNA with n=7, and 10 µg of electroporated pDNA (EP pDNA) with n=8.

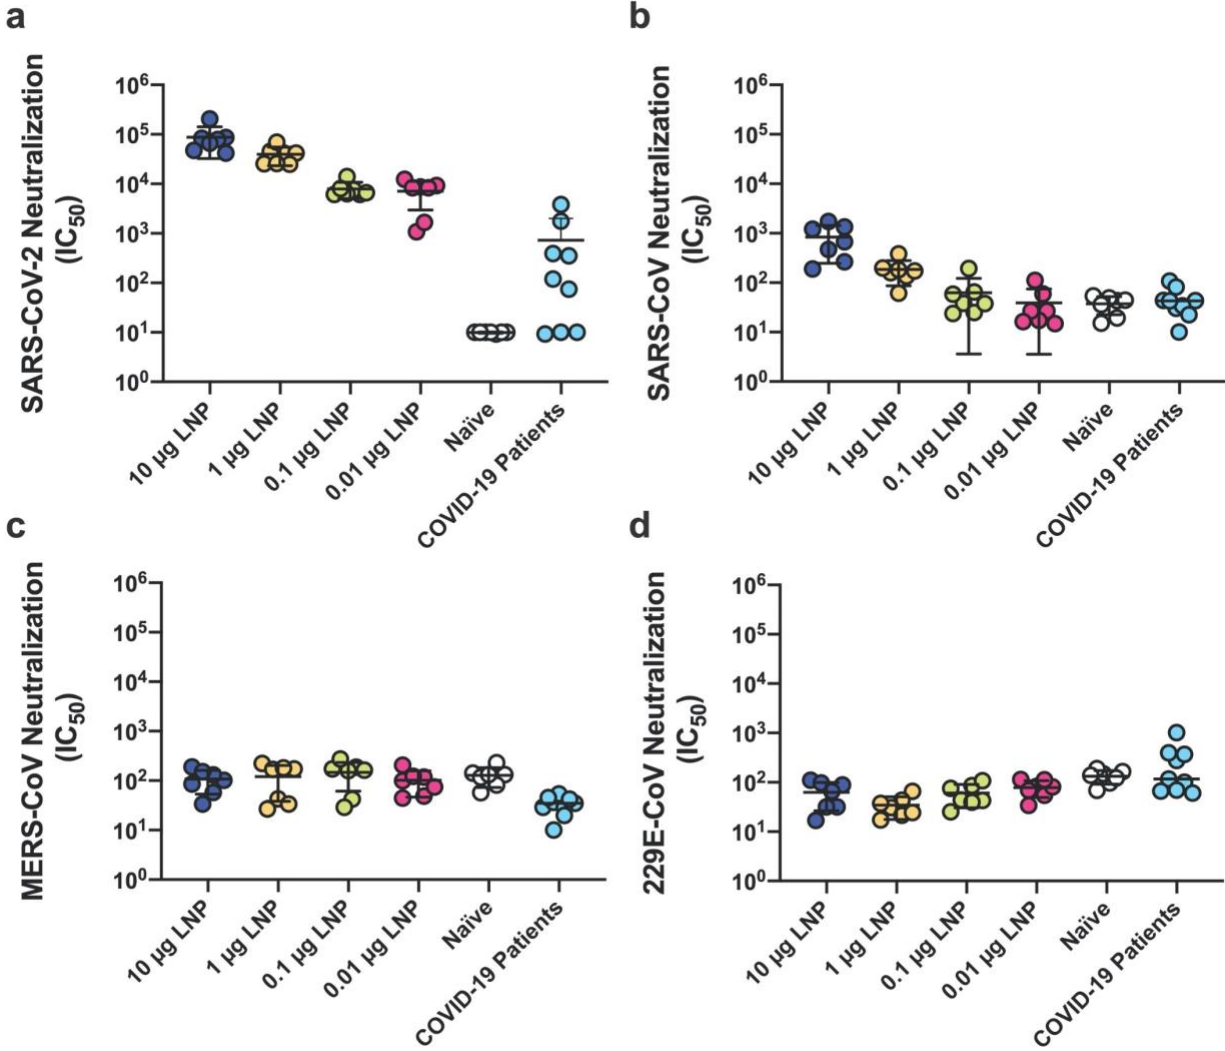

**Supplementary Figure 3.** Pseudotyped virus neutralization of sera from BALB/c mice vaccinated with LNP formulations and human patients after recovery from COVID-19.

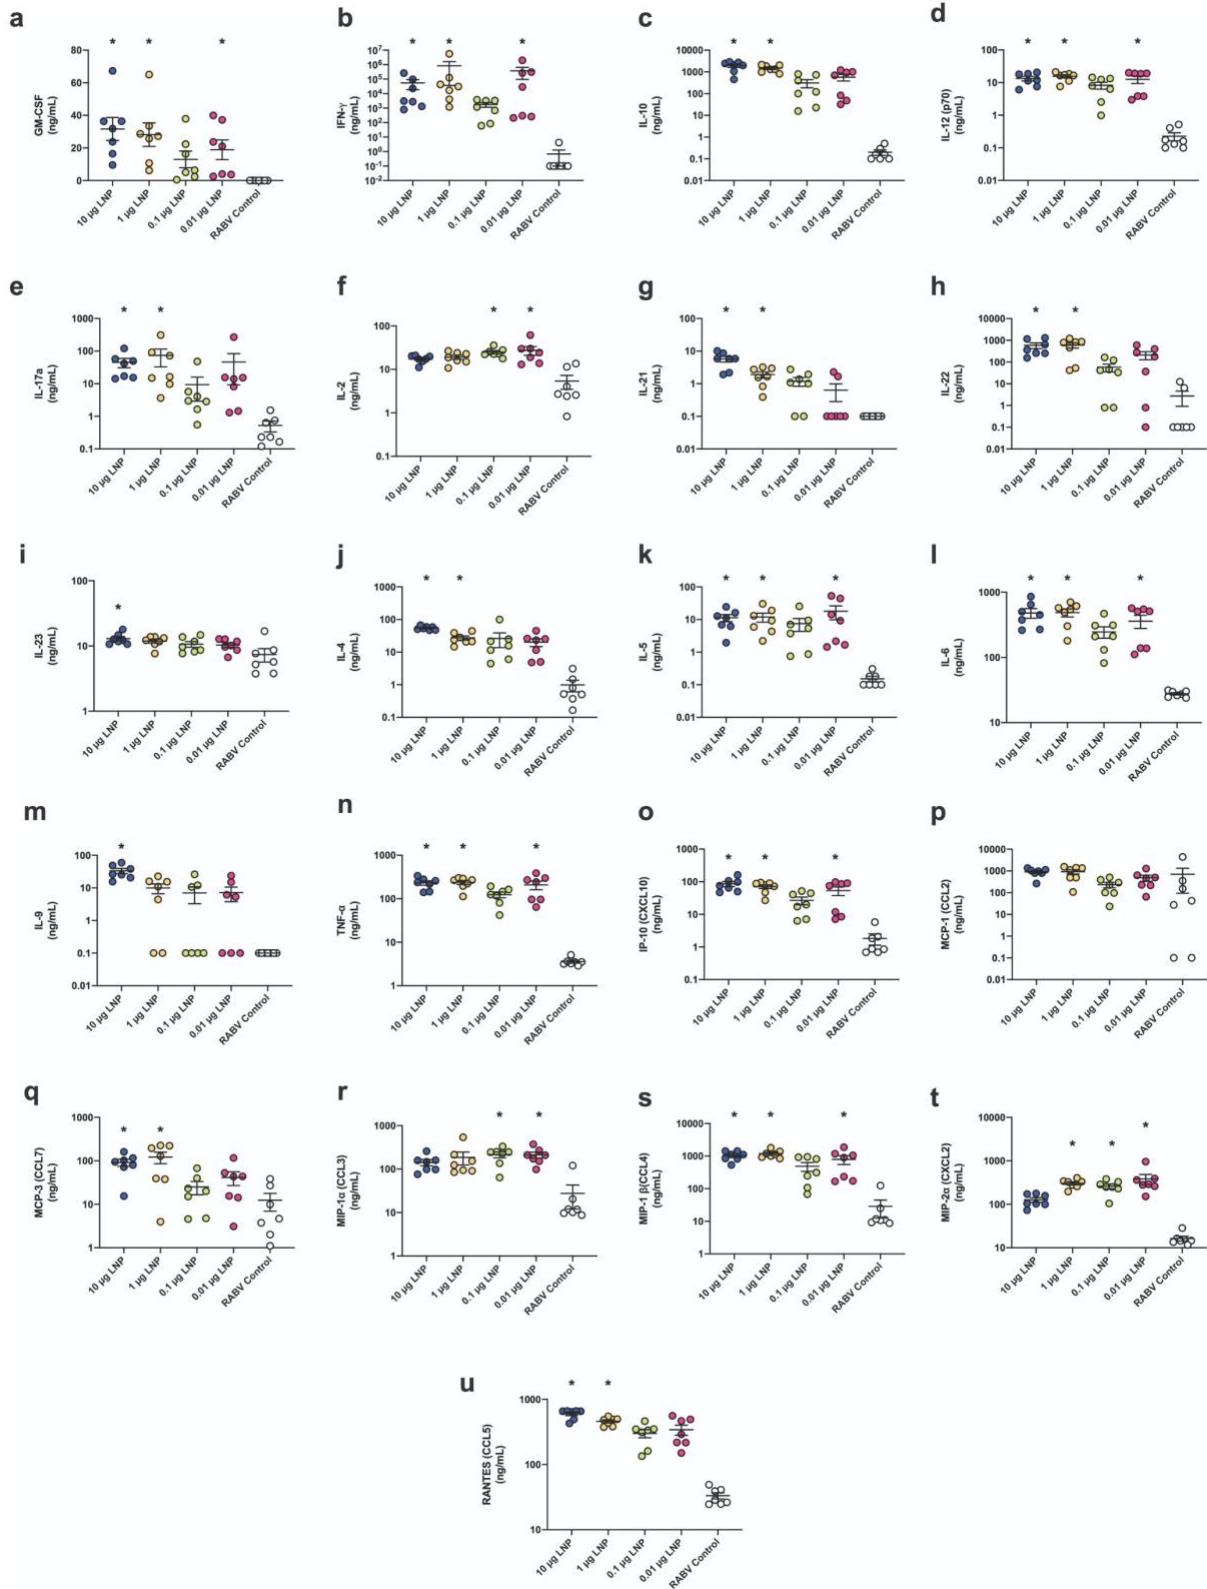

**Supplementary Figure 4.** Cytokine response of re-stimulated splenocytes of vaccinated mice with recombinant SARS-CoV-2 protein.

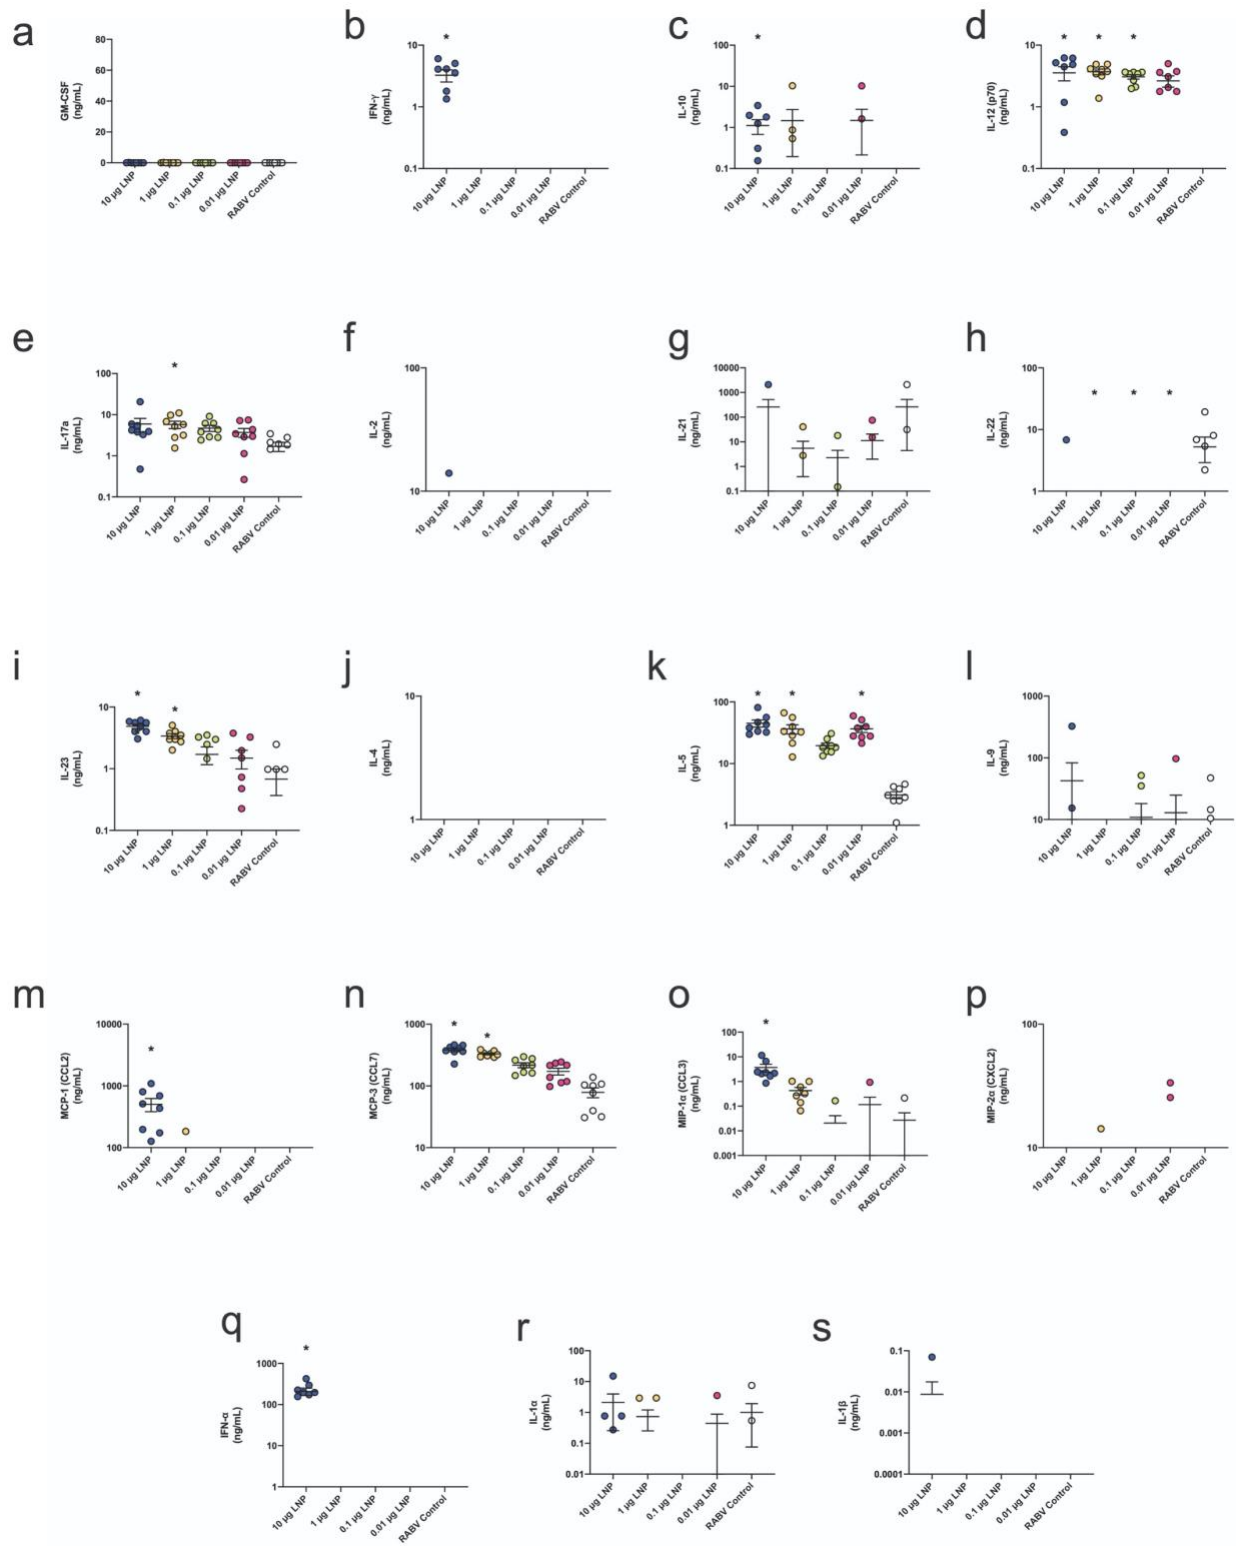

**Supplementary Figure 5.** Cytokine response in the sera of mice 4 hours after vaccination with SARS-CoV-2 LNP vaccine.
